# Supplementary material for: Fecal Calprotectin in Self-Reported Milk Intolerance: Not Only Lactose Intolerance
Source: MDPI journal article supplement (doi:10.3390/nu15041048), 2023-02-20
Supplement: s1 [file s1]

**Table S1.** Extraintestinal symptoms of the patients with SRMI, divided by system, in order of frequency.

| Extraintestinal symptoms                                                  | SRMI <sup>1</sup><br>(n=329) (%)<br>(A+B+C) | SRMI <sup>1</sup> Lactose<br>tolerants <sup>2</sup><br>(n=104) (%) (A) | SRMI <sup>1</sup><br>Maldigesters/<br>Intolerants <sup>3</sup><br>(n=187) (%) (B) | SRMI <sup>1</sup><br>Digesters/<br>Intolerants <sup>4</sup><br>(n=38) (%) (C) | P               |
|---------------------------------------------------------------------------|---------------------------------------------|------------------------------------------------------------------------|-----------------------------------------------------------------------------------|-------------------------------------------------------------------------------|-----------------|
| Constitutional symptoms                                                   | 18 (5.5)                                    | 5 (4.8)                                                                | 12 (6.4)                                                                          | 1 (2.6)                                                                       | NS <sup>5</sup> |
| Fatigue                                                                   | 17 (5.2)                                    | 4 (3.8)                                                                | 12 (6.4)                                                                          | 1 (2.6)                                                                       | NS <sup>5</sup> |
| Chills                                                                    | 1 (0.3)                                     | 1 (1.0)                                                                | 0 (0.0)                                                                           | 0 (0.0)                                                                       | NS <sup>5</sup> |
| Skin disorders                                                            | 18 (5.5)                                    | 6 (5.8)                                                                | 11 (5.9)                                                                          | 1 (2.6)                                                                       | NS <sup>5</sup> |
| Itching                                                                   | 10 (3.0)                                    | 3 (2.9)                                                                | 6 (3.2)                                                                           | 1 (2.6)                                                                       | NS <sup>5</sup> |
| Swelling under the skin                                                   | 3 (0.9)                                     | 1 (1.0)                                                                | 2 (1.1)                                                                           | 0 (0.0)                                                                       | NS <sup>5</sup> |
| Erythema and/or eczema                                                    | 2 (0.6)                                     | 1 (1.0)                                                                | 1 (0.5)                                                                           | 0 (0.0)                                                                       | NS <sup>5</sup> |
| Sweating                                                                  | 2 (0.6)                                     | 1 (1.0)                                                                | 1 (0.5)                                                                           | 0 (0.0)                                                                       | NS <sup>5</sup> |
| Alopecia                                                                  | 1 (0.3)                                     | 0 (0.0)                                                                | 1 (0.5)                                                                           | 0 (0.0)                                                                       | NS <sup>5</sup> |
| Urticaria-angioedema                                                      | 1 (0.3)                                     | 1 (1.0)                                                                | 0 (0.0)                                                                           | 0 (0.0)                                                                       | NS <sup>5</sup> |
| Skeletal disorders                                                        | 4 (1.2)                                     | 1 (1.0)                                                                | 3 (1.6)                                                                           | 0 (0.0)                                                                       | NS <sup>5</sup> |
| Myalgia                                                                   | 3 (0.9)                                     | 1 (1.0)                                                                | 2 (1.1)                                                                           | 0 (0.0)                                                                       | NS <sup>5</sup> |
| Arthralgia                                                                | 1 (0.3)                                     | 0 (0.0)                                                                | 1 (0.5)                                                                           | 0 (0.0)                                                                       | NS <sup>5</sup> |
| Neurosensorial disorders                                                  | 38 (11.6)                                   | 17 (16.3)                                                              | 18 (9.6)                                                                          | 3 (7.9)                                                                       | NS <sup>5</sup> |
| Headache                                                                  | 33 (10.0)                                   | 15 (14.4)                                                              | 15 (8.0)                                                                          | 3 (7.9)                                                                       | NS <sup>5</sup> |
| Anxiety                                                                   | 2 (0.6)                                     | 1 (1.0)                                                                | 1 (0.5)                                                                           | 0 (0.0)                                                                       | NS <sup>5</sup> |
| Visual disturbances                                                       | 2 (0.6)                                     | 1 (1.0)                                                                | 1 (0.5)                                                                           | 0 (0.0)                                                                       | NS <sup>5</sup> |
| Tinnitus                                                                  | 1 (0.3)                                     | 0 (0.0)                                                                | 1 (0.5)                                                                           | 0 (0.0)                                                                       | NS <sup>5</sup> |
| Oral disorders                                                            | 8 (2.4)                                     | 3 (2.9)                                                                | 5 (2.7)                                                                           | 0 (0.0)                                                                       | NS <sup>5</sup> |
| Dysphagia                                                                 | 4 (1.1)                                     | 2 (1.9)                                                                | 2 (1.1)                                                                           | 0 (0.0)                                                                       | NS <sup>5</sup> |
| Glossitis                                                                 | 2 (0.6)                                     | 0 (0.0)                                                                | 2 (1.1)                                                                           | 0 (0.0)                                                                       | NS <sup>5</sup> |
| Recurrent aphthous stomatitis                                             | 2 (0.6)                                     | 1 (1.0)                                                                | 1 (0.5)                                                                           | 0 (0.0)                                                                       | NS <sup>5</sup> |
| Xerostomia                                                                | 1 (0.3)                                     | 0 (0.0)                                                                | 1 (0.5)                                                                           | 0 (0.0)                                                                       | NS <sup>5</sup> |
| Respiratory disorders                                                     | 6 (1.8)                                     | 1 (1.0)                                                                | 4 (2.1)                                                                           | 1 (2.6)                                                                       | NS <sup>5</sup> |
| Dyspnea                                                                   | 5 (1.5)                                     | 0 (0.0)                                                                | 4 (2.1)                                                                           | 1 (2.6)                                                                       | NS <sup>5</sup> |
| Cough                                                                     | 1 (0.3)                                     | 0 (0.0)                                                                | 0 (0.0)                                                                           | 1 (2.6)                                                                       | NS <sup>5</sup> |
| Sneezing                                                                  | 1 (0.3)                                     | 1 (1.0)                                                                | 0 (0.0)                                                                           | 0 (0.0)                                                                       | NS <sup>5</sup> |
| Cardiovascular disorders<br>(Palpitations, Tachycardia,<br>Extrasystoles) | 6 (1.8)                                     | 2 (1.9)                                                                | 4 (2.1)                                                                           | 0 (0.0)                                                                       | NS <sup>5</sup> |
| Urinary disorders                                                         | 2 (0.6)                                     | 0 (0.0)                                                                | 1 (0.5)                                                                           | 1 (2.6)                                                                       | NS <sup>5</sup> |
| Incontinence                                                              | 1 (0.3)                                     | 0 (0.0)                                                                | 1 (0.5)                                                                           | 0 (0.0)                                                                       | NS <sup>5</sup> |
| Recurrent cystitis                                                        | 1 (0.3)                                     | 0 (0.0)                                                                | 0 (0.0)                                                                           | 1 (2.6)                                                                       | NS <sup>5</sup> |

<sup>1</sup>SRMI= Self-Reported Milk Intolerance; <sup>2</sup>Lactose tolerant= Lactose Hydrogen Breath test positive or negative without symptoms within 24 hours after the test; <sup>3</sup>Maldigesters/intolerants= Lactose Hydrogen Breath test positive with symptoms within 24 hours after the test; <sup>4</sup>Digesters/intolerants= Lactose Hydrogen Breath test negative with symptoms within 24 hours after the test; <sup>5</sup>NS=not significant

**Table S2.** Milk and products responsible for symptoms in patients with SRMI.

|                      | <b>SRMI<sup>1</sup><br/>(n=329)<br/>(A+B+C)</b> | <b>SRMI<sup>1</sup><br/>Lactose<br/>tolerants<sup>2</sup><br/>(n=104) (%)<br/>(A)</b> | <b>SRMI<sup>1</sup><br/>Maldigesters/<br/>Intolerants<sup>3</sup><br/>(n=187) (%) (B)</b> | <b>SRMI<sup>1</sup><br/>Digesters/<br/>Intolerants<sup>4</sup><br/>(n=38) (%)<br/>(C)</b> | <b><i>P</i></b> |
|----------------------|-------------------------------------------------|---------------------------------------------------------------------------------------|-------------------------------------------------------------------------------------------|-------------------------------------------------------------------------------------------|-----------------|
| Cow's milk           | 324 (98.5)                                      | 102 (98.1)                                                                            | 185 (98.9)                                                                                | 37 (97.4)                                                                                 | NS <sup>5</sup> |
| Fresh dairy products | 240 (72.9)                                      | 78 (75.0)                                                                             | 133 (71.1)                                                                                | 29 (76.3)                                                                                 | NS <sup>5</sup> |
| Aged dairy products  | 97 (29.5)                                       | 35 (33.7)                                                                             | 48 (25.7)                                                                                 | 14 (36.8)                                                                                 | NS <sup>5</sup> |

<sup>1</sup>SRMI = Self-Reported Milk Intolerance; <sup>2</sup>Lactose tolerants = Lactose Hydrogen Breath test positive or negative without symptoms within 24 hours after the test; <sup>3</sup>Maldigesters/intolerants= Lactose Hydrogen Breath test positive with symptoms within 24 hours after the test; <sup>4</sup>Digesters/intolerants= Lactose Hydrogen Breath test negative with symptoms within 24 hours after the test; <sup>5</sup>NS=not significant.
